# Supplementary figures and images for: Profiles of Motor-Cognitive Interference in Parkinson’s Disease—The Trail-Walking-Test to Discriminate between Motor Phenotypes
Source: MDPI journal article supplement (doi:10.3390/brainsci12091217), 2022-09-09

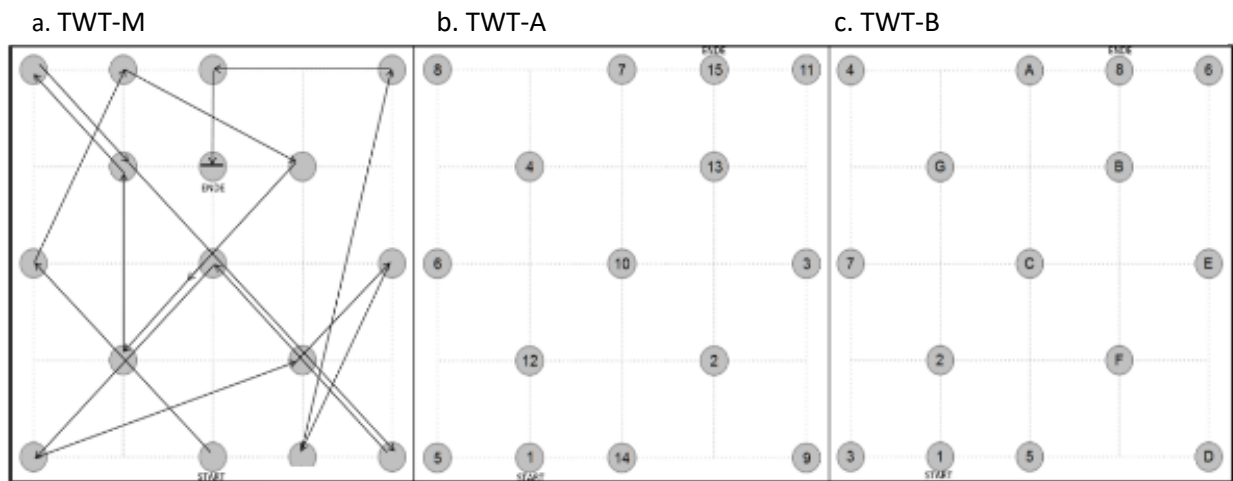

Figure S1: The conditions of the Trail-Walking-Test

Supplement: s1 [file s1]
